# Supplementary material for: A machine learning approach to address air quality changes during the COVID-19 lockdown in Buenos Aires, Argentina
Source: Copernicus journal article supplement (doi:10.5194/essd-15-189-2023), 2023-01-10
Supplement: Supplementary file 1 [file essd-15-189-2023-supplement.pdf]

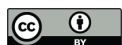

## *Supplement of*

# **A machine learning approach to address air quality changes during the COVID-19 lockdown in Buenos Aires, Argentina**

**Melisa Diaz Resquin et al.**

*Correspondence to:* Melisa Diaz Resquin ([mdiazresquin@fi.uba.ar](mailto:mdiazresquin@fi.uba.ar)) and Laura Dawidowski ([dawidows@cnea.gov.ar](mailto:dawidows@cnea.gov.ar))

The copyright of individual parts of the supplement might differ from the article licence.

## S1. Supplementary Material

### S1.1 Analysis of CNEA site during training period

#### S1.1.1 Temporal Variations

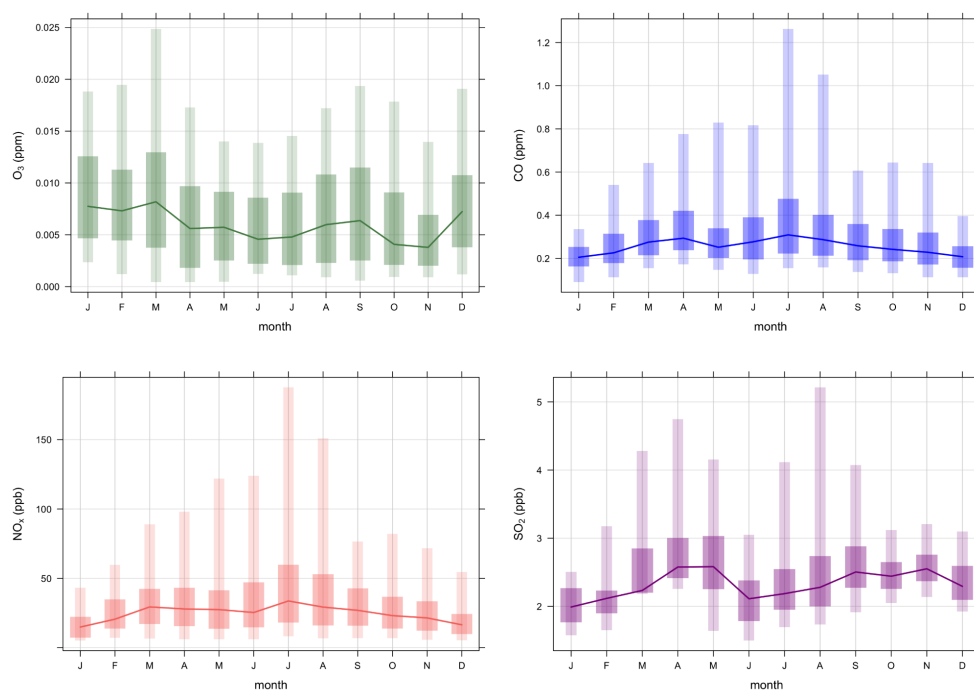

Fig. S1: Boxplot of training period ground-based observations for CNEA site.

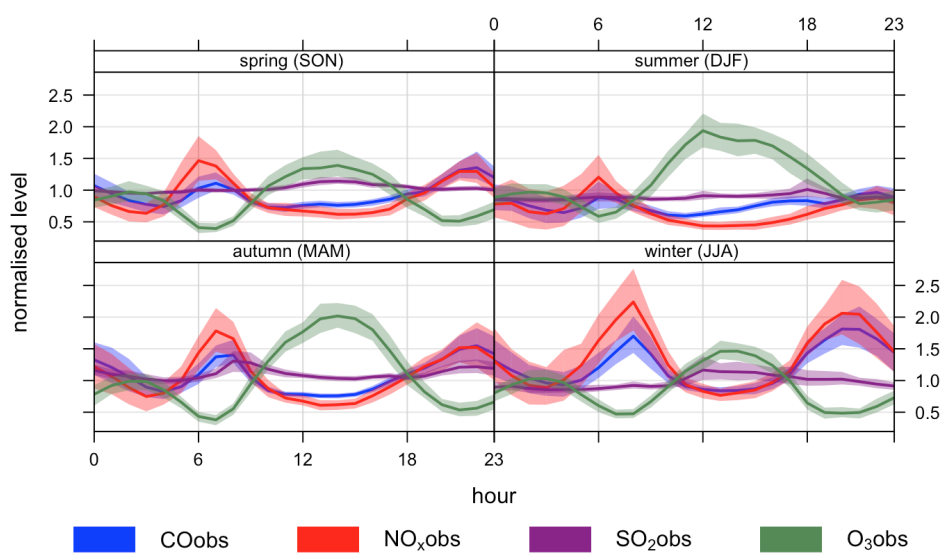

Fig S2: Seasonal diurnal cycles of training period ground-based observations for the CNEA site.

### S.1.1.2 Bivariate polar plots for training period

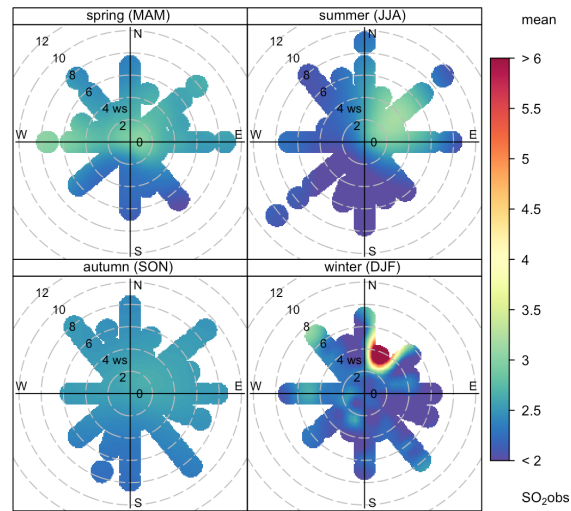

Figure S3: SO<sub>2</sub> seasonal bivariate polar plots for training period (CNEA site).

### S1.2 Analysis of CNEA site during evaluation period

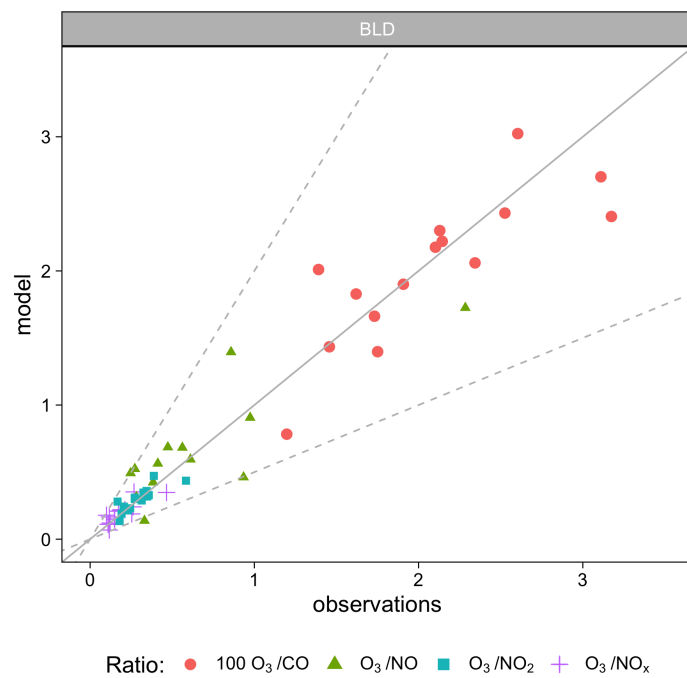

Figure S4. Scatter plot for O<sub>3</sub> ratios during evaluation period (BLD) in CNEA site. For better visualization O<sub>3</sub>-CO ratio was multiplied by 100. The 1:1 line is solid and the 1:0.5 and 1:2 lines are dashed. Values within the dashed lines represent the fraction of values that are within a factor of 2 of the observations. Pearson correlation coefficients:  $r_{\text{O}_3\text{-CO}} = 0.79$ ,  $r_{\text{O}_3\text{-NO}} = 0.85$ ,  $r_{\text{O}_3\text{-NO}_2} = 0.87$ ,  $r_{\text{O}_3\text{-CO}_x} = 0.89$ .

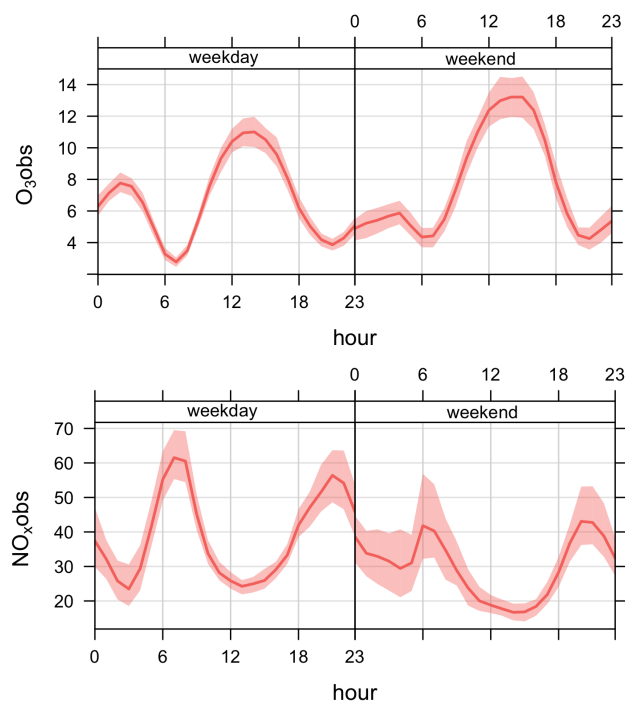

Figure S5. Mean diurnal cycle for weekends and weekdays for  $O_3$  [ppb] and  $NO_x$  [ppb] during the training period (February 2019 to February 2020) at CNEA site.

## S2.1 Variable Importance Plots

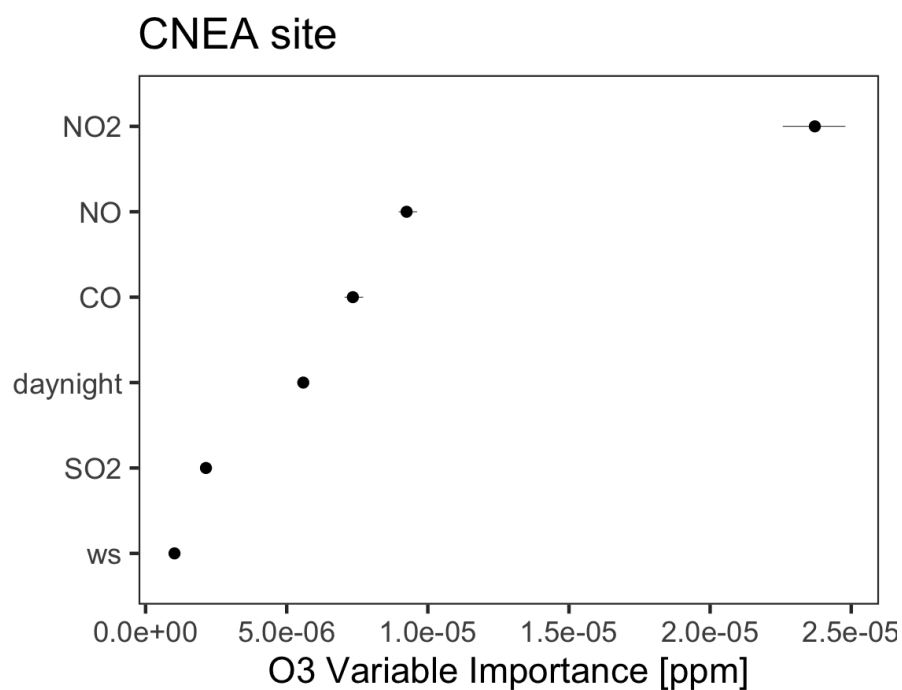

Figure S6.  $O_3$  Variable Importance Plot (permutation difference) for RF for CNEA site (ppm). The dot represents the mean value and the line is the variable importance from 25th and the 75th percentile estimated with the 50 simulations run.

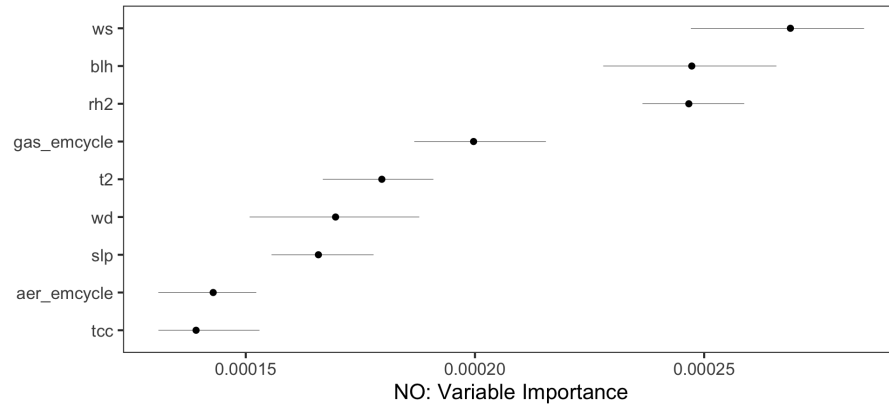

Figure S7. NO Variable Importance Plot (permutation difference) for RF for CNEA site (ppm). The dot represents the mean value and the line is the variable importance from 25th and the 75th percentile estimated with the 50 simulations run.

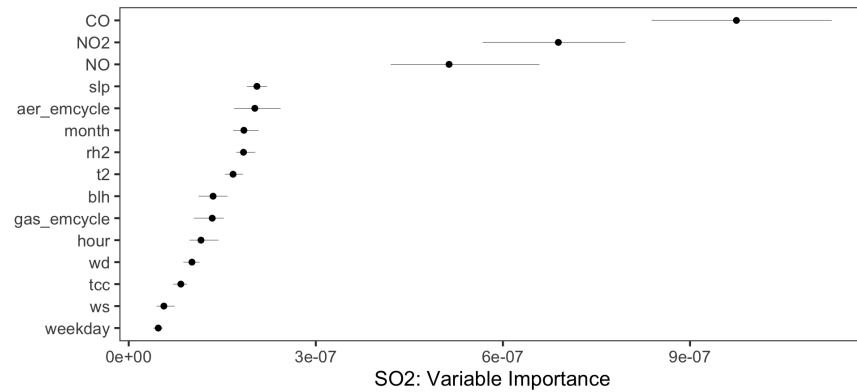

Figure S8. SO<sub>2</sub> Variable Importance Plot (permutation difference) for RF for CNEA site (ppm). The dot represents the mean value and the line is the variable importance from 25th and the 75th percentile estimated with the 50 simulations run.

## S2.2 Partial Dependence plots (ppm)

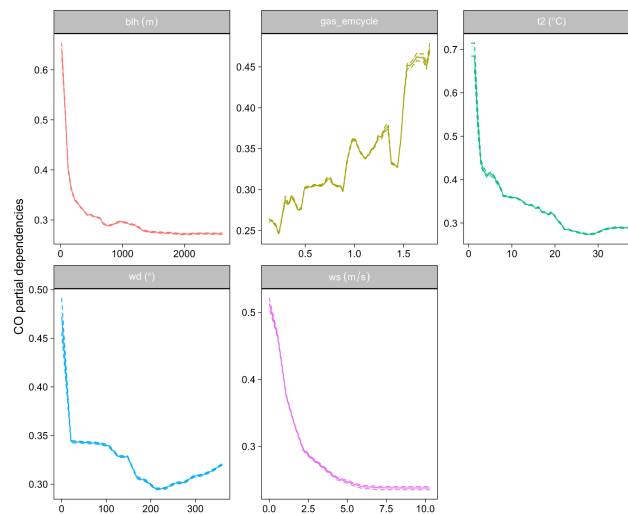

Figure S9. CO Partial dependencies plot (ppm) for RF for CNEA site . The shaded Area represents the variable importance between 25th and 75th percentile estimated from the 50 simulations.

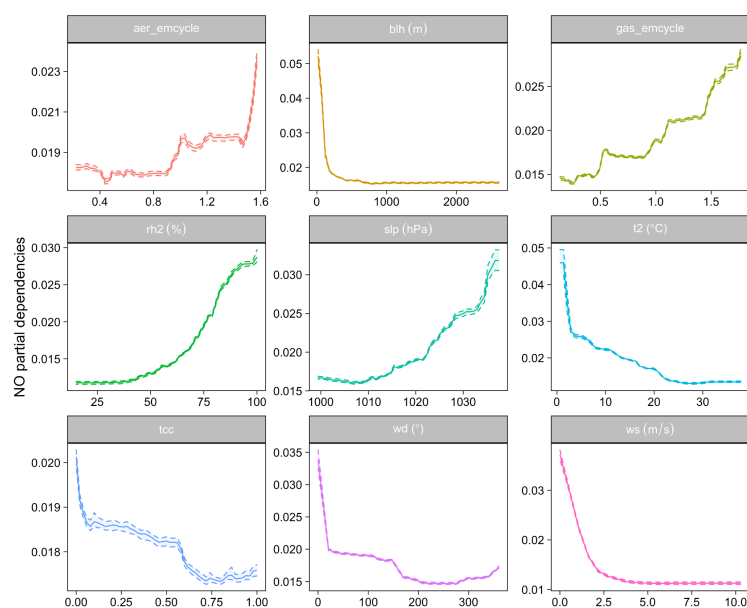

Figure S10. NO Partial dependencies plot (ppm) for RF for CNEA site. The shaded Area represents the variable importance between 25th and 75th percentile estimated from the 50 simulations.

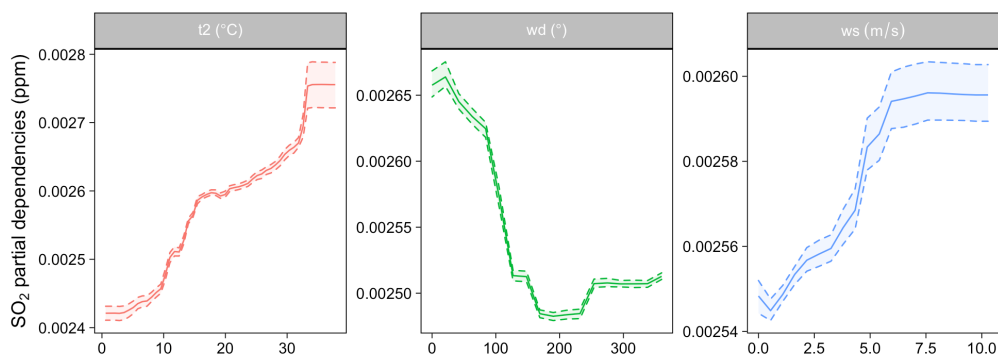

Figure S11. SO<sub>2</sub> Partial dependencies plot (ppm) for RF for CNEA site for temperature and winds. The shaded Area represents the variable importance between 25th and 75th percentile estimated from the 50 simulations.
